# Supplementary material
Source: HighWire-hosted journal article supplement (http://www.qdcxjkg.com/highwire/filestream/113430/field_highwire_adjunct_files/0/GT-MTBDRsl_SupplRevision_14Dec11.pdf)
Supplement: GT-MTBDRsl_SupplRevision_14Dec11.pdf [file GT-MTBDRsl_SupplRevision_14Dec11.pdf]

## Supplementary material

**TABLE S1.** Primers used to perform genetic sequencing of regions targeted by the GenoType MTBDRs/.

| Drug resistance              | Target gene             | Gene ID | Primer sequence (5' - 3') | T <sub>annealing</sub> (°C) |
|------------------------------|-------------------------|---------|---------------------------|-----------------------------|
| Fluoroquinolones             | <i>gyrA</i><br>(Rv0006) | 887105  | CAATGTTTCGATTCCGGCTTC     | 58                          |
|                              |                         |         | CTCCATCGCCAACGGG          | 58                          |
| Second-line injectable drugs | <i>rrs</i> (rvnr01)     | 2700429 | GCCGCAAGGCTAAAACCTCAAAG   | 58                          |
|                              |                         |         | GTACGGCTACCTTGTTACGACTTC  | 58                          |
| Ethambutol                   | <i>embB</i><br>(Rv3795) | 886126  | TTCTCCACCCGGCCGACC        | 65                          |
|                              |                         |         | CAGCGCGGCCACCGC           | 65                          |

T: temperature.

**TABLE S2.** Comparison between the GenoType MTBDRs/ and sequencing in 175 clinical isolates tested.

|                                | Sequence<br>% (95% CI) |
|--------------------------------|------------------------|
| <b>Fluoroquinolones</b>        |                        |
| Sensitivity                    | 100 (90,8-100)         |
| Specificity                    | 96,3 (91,7-98,4)       |
| PPV                            | 88,4 (75,5-94,9)       |
| NPV                            | 100 (97,2-100)         |
| <b>Second-line injectables</b> |                        |
| Sensitivity                    | 100 (95,6-100)         |
| Specificity                    | 96,7 (90,7-98,9)       |
| PPV                            | 96,6 (90,4-98,8)       |
| NPV                            | 100 (95,8-100)         |
| <b>Ethambutol</b>              |                        |
| Sensitivity                    | 100 (95,6-100)         |
| Specificity                    | 96,7 (90,7-98,9)       |
| PPV                            | 96,6 (90,4-98,8)       |
| NPV                            | 100 (95,8-100)         |

**TABLE S3.** Spoligotyping profiles of the 175 clinical isolates included in the evaluation of the performance of the MTBDRs/.

| Lineage          | Fluoroquinolones DST |      |     |      |     |      | Second-line injectable drugs DST |      |    |      |     |      | Ethambutol* DST |      |    |      |     |      |
|------------------|----------------------|------|-----|------|-----|------|----------------------------------|------|----|------|-----|------|-----------------|------|----|------|-----|------|
|                  | R                    |      | S   |      | Tot | %    | R                                |      | S  |      | Tot | %    | R               |      | S  |      | Tot | %    |
|                  | n                    | %    | n   | %    |     |      | n                                | %    | n  | %    |     |      | n               | %    | n  | %    |     |      |
| <b>Beijing</b>   | 26                   | 45,6 | 38  | 32,2 | 64  | 36,6 | 46                               | 54,8 | 18 | 19,8 | 64  | 36,6 | 44              | 35,5 | 20 | 39,2 | 64  | 36,6 |
| <b>Cameroon</b>  | 2                    | 3,5  | 1   | 0,8  | 3   | 1,7  | 0                                | 0,0  | 3  | 3,3  | 3   | 1,7  | 1               | 0,8  | 2  | 3,9  | 3   | 1,7  |
| <b>Dehli/CAS</b> | 1                    | 1,8  | 2   | 1,7  | 3   | 1,7  | 0                                | 0,0  | 3  | 3,3  | 3   | 1,7  | 2               | 1,6  | 1  | 2,0  | 3   | 1,7  |
| <b>Ghana</b>     | 7                    | 12,3 | 27  | 22,9 | 34  | 19,4 | 8                                | 9,5  | 26 | 28,6 | 34  | 19,4 | 26              | 21,0 | 8  | 15,7 | 34  | 19,4 |
| <b>Haarlem</b>   | 1                    | 1,8  | 7   | 5,9  | 8   | 4,6  | 2                                | 2,4  | 6  | 6,6  | 8   | 4,6  | 4               | 3,2  | 4  | 7,8  | 8   | 4,6  |
| <b>LAM</b>       | 3                    | 5,3  | 12  | 10,2 | 15  | 8,6  | 7                                | 8,3  | 8  | 8,8  | 15  | 8,6  | 9               | 7,3  | 6  | 11,8 | 15  | 8,6  |
| <b>S</b>         | 4                    | 7,0  | 3   | 2,5  | 7   | 4,0  | 6                                | 7,1  | 1  | 1,1  | 7   | 4,0  | 7               | 5,6  | 0  | 0,0  | 7   | 4,0  |
| <b>TUR</b>       | 3                    | 5,3  | 13  | 11,0 | 16  | 9,1  | 1                                | 1,2  | 15 | 16,5 | 16  | 9,1  | 9               | 7,3  | 7  | 13,7 | 16  | 9,1  |
| <b>Uganda I</b>  | 1                    | 1,8  | 2   | 1,7  | 3   | 1,7  | 2                                | 2,4  | 1  | 1,1  | 3   | 1,7  | 3               | 2,4  | 0  | 0,0  | 3   | 1,7  |
| <b>Ural</b>      | 5                    | 8,8  | 3   | 2,5  | 8   | 4,6  | 7                                | 8,3  | 1  | 1,1  | 8   | 4,6  | 6               | 4,8  | 2  | 3,9  | 8   | 4,6  |
| <b>W african</b> | 0                    | 0,0  | 0   | 0,0  | 0   | 0,0  | 0                                | 0,0  | 0  | 0,0  | 0   | 0,0  | 0               | 0,0  | 0  | 0,0  | 0   | 0,0  |
| <b>X</b>         | 0                    | 0,0  | 1   | 0,8  | 1   | 0,6  | 1                                | 1,2  | 0  | 0,0  | 1   | 0,6  | 1               | 0,8  | 0  | 0,0  | 1   | 0,6  |
| <b>Unknown</b>   | 4                    | 7,0  | 9   | 7,6  | 13  | 7,4  | 5                                | 4,8  | 8  | 9,9  | 13  | 7,4  | 12              | 9,7  | 1  | 2,0  | 13  | 7,4  |
| <b>Total</b>     | 57                   |      | 118 |      | 175 |      | 85                               |      | 90 |      | 175 |      | 124             |      | 51 |      | 175 |      |

\* the phenotypic DST result is adjusted according to the minimum inhibitory concentration results; DST: drug-susceptibility testing; R: resistant; S: susceptibility.

**TABLE S4.** Frequency of mutations affecting *gyrA* gene among Beijing and non-Beijing lineages in 54 fluoroquinolone resistant clinical isolates.

| Sequence   | Beijing |             | total w/o Beijing |             |
|------------|---------|-------------|-------------------|-------------|
|            | n       | %           | n                 | %           |
| WT         | 6       | <b>23,1</b> | 9                 | <b>29,0</b> |
| A90V       | 5       | <b>19,2</b> | 10                | <b>32,3</b> |
| S91P       | 1       | <b>3,8</b>  | 3                 | <b>9,7</b>  |
| D94A       | 3       | <b>11,5</b> | 3                 | <b>9,7</b>  |
| D94N       | 1       | <b>3,8</b>  | 1                 | <b>3,2</b>  |
| D94Y       | 2       | <b>7,7</b>  | 0                 | <b>0,0</b>  |
| D94G       | 8       | <b>30,8</b> | 5                 | <b>16,1</b> |
| D94H       | 0       | <b>0,0</b>  | 0                 | <b>0,0</b>  |
| Other QRDR | 0       | <b>0,0</b>  | 0                 | <b>0,0</b>  |

QRDR: quinolone-resistance determining region; w/o: without.

**TABLE S5.** Distribution of mutations affecting the *rrs* gene among the 84 clinical isolates phenotypically resistant to at least one second-line injectable drug.

| CAP | AMK | KAN | GT-MTBDRs/   | Sequence  | n  | %    |
|-----|-----|-----|--------------|-----------|----|------|
| na  | R   | na  | a1484t       | WT        | 1  | 1,2  |
| na  | R   | na  | a1401g       | a1401g    | 1  | 1,2  |
| na  | R   | S   | WT           | WT        | 1  | 1,2  |
| na  | S   | R   | WT           | WT        | 3  | 3,6  |
| R   | S   | S   | WT           | WT        | 3  | 3,6  |
| R   | S   | R   | WT           | WT        | 2  | 2,4  |
| R   | S   | R   | a1401g       | a1401g    | 1  | 1,2  |
| R   | R   | R   | a1401g       | a1401g    | 44 | 52,4 |
| R   | R   | R   | a1401g-1484t | a1401g    | 3  | 3,6  |
| R   | R   | R   | no WT        | a1402t    | 1  | 1,2  |
| R   | R   | R   | WT           | WT        | 4  | 4,8  |
| R   | R   | S   | a1401g       | a1401g    | 1  | 1,2  |
| S   | R   | S   | WT           | WT        | 1  | 1,2  |
| S   | R   | R   | a1401g       | a1401g    | 6  | 7,1  |
| S   | R   | R   | WT           | WT        | 1  | 1,2  |
| S   | R   | R   | WT+a1401g    | WT+a1401g | 1  | 1,2  |
| S   | R   | R   | WT+a1401g    | WT        | 1  | 1,2  |
| S   | S   | R   | WT           | WT        | 9  | 10,7 |

CAP: capreomycin; AMK: amikacin; KAN: kanamycin; R: resistant; S: susceptible; na: not available.

**TABLE S6.** Frequency of mutations affecting the *rrs* gene among Beijing and non-Beijing lineages in 85 second-line injectable drug-resistant clinical isolates.

| Sequence         | Beijing |             | total w/o beijing |             |
|------------------|---------|-------------|-------------------|-------------|
|                  | n       | %           | n                 | %           |
| WT               | 10      | <b>21,7</b> | 16                | <b>41,0</b> |
| a1401g           | 35      | <b>76,1</b> | 23                | <b>59,0</b> |
| g1484t           | 0       | <b>0,0</b>  | 0                 | <b>0,0</b>  |
| Other <i>rrs</i> | 1       | <b>2,2</b>  | 0                 | <b>0,0</b>  |

w/o: without.

**TABLE S7.** Other mutations identified in the *embB* gene of 37 ethambutol-resistant strains showing a wild-type sequence at codon 306.

| cod. 306 | Whole ERDR           | n  |
|----------|----------------------|----|
| WT       | WT                   | 21 |
|          | G406A                | 4  |
|          | Y319C                | 3  |
|          | D354A+S426N          | 1  |
|          | D328Y                | 1  |
|          | G406S                | 1  |
|          | Y319D                | 1  |
|          | Y319S                | 2  |
|          | C361S+E405D          | 1  |
|          | N296H                | 1  |
|          | ins. ctg at cod. 332 | 1  |

Cod: codon; ERDR: ethambutol-resistance determining region; ins: insertion.

**TABLE S8.** Frequency of mutations affecting the *embB* gene in 125 ethambutol-resistant clinical isolates belonging or not-belonging to the Beijing lineage.

| Sequence          | Beijing |             | total w/o beijing |             |
|-------------------|---------|-------------|-------------------|-------------|
|                   | n       | %           | n                 | %           |
| WT                | 13      | <b>29,5</b> | 24                | <b>30,0</b> |
| M306V             | 24      | <b>54,5</b> | 30                | <b>37,5</b> |
| M306I             | 7       | <b>15,9</b> | 25                | <b>31,3</b> |
| Other <i>embB</i> | 0       | <b>0,0</b>  | 1                 | <b>1,3</b>  |

w/o: without.

**TABLE S9. Comparison of the performances of the GenoType MTBDRs/ among lineages.**

|                                | <b>Beijing<br/>% (95% CI)</b> | <b>Non-Beijing<br/>% (95% CI)</b> | <b>Mid-p exact<br/>test</b> |
|--------------------------------|-------------------------------|-----------------------------------|-----------------------------|
| <b>Fluoroquinolones</b>        |                               |                                   |                             |
| <b>Sensitivity</b>             | 76,9 (58,0-89,0)              | 71,0 (53,4-83,9)                  |                             |
| <b>Specificity</b>             | 100 (90,8-100)                | 98,8 (93,3-99,8)                  |                             |
| <b>PPV</b>                     | 100 (83,9-100)                | 95,7 (79,0-99,2)                  |                             |
| <b>NPV</b>                     | 86,4 (73,3-93,6)              | 89,8 (81,7-94,5)                  |                             |
| <b>Diagnostic accuracy</b>     | 90,6 (81,0-95,6)              | 91,0 (84,2-95,0)                  |                             |
| <b>Second-line injectables</b> |                               |                                   |                             |
| <b>Sensitivity</b>             | 78,3 (64,4-87,7)              | 59,0 (43,4-72,9)                  | ***                         |
| <b>Specificity</b>             | 100 (82,4-100)                | 98,6 (92,6-99,8)                  |                             |
| <b>PPV</b>                     | 100 (90,4-100)                | 95,8 (79,8-99,3)                  |                             |
| <b>NPV</b>                     | 64,3 (45,8-79,3)              | 81,8 (72,5-88,5)                  | ***                         |
| <b>Diagnostic accuracy</b>     | 84,4 (73,6-91,3)              | 84,8 (77,0-90,3)                  |                             |
| <b>Ethambutol*</b>             |                               |                                   |                             |
| <b>Sensitivity</b>             | 70,5 (55,8-81,8)              | 70,0 (59,2-78,9)                  |                             |
| <b>Specificity</b>             | 100 (83,9-100)                | 96,8 (83,8-99,4)                  |                             |
| <b>PPV</b>                     | 100 (89,0-100)                | 98,3 (90,7-99,7)                  |                             |
| <b>NPV</b>                     | 60,6 (43,7-75,3)              | 55,6 (42,4-68,0)                  |                             |
| <b>Diagnostic accuracy</b>     | 79,7 (68,3-87,7)              | 77,5 (68,9-84,3)                  |                             |

CI: confidence interval; PPV: positive predictive value; NPV: negative predictive value; \*: the phenotypic DST result is adjusted according to the minimum inhibitory concentration results.
